# Supplementary material for: SARS-CoV-2 variant Alpha has a spike-dependent replication advantage over the ancestral B.1 strain in human cells with low ACE2 expression
Source: PLoS Biol. 2022 Nov 16;20(11):e3001871. doi: 10.1371/journal.pbio.3001871 (PMC9710838; doi:10.1371/journal.pbio.3001871)
Supplement: S3 Table — (XLSX) [file pbio.3001871.s014.xlsx]

## Sheet: Tabelle1
Side directed mutagenesis:
F10 D614G F	TCTTTATCAGGGTGTTAACTGCAC
F10 D614G R	ACAGCAACCTGGTTAGAAGTATTTG
RT PCR:
5R	TGTTTAGCAAGATTGTGTCCGCT
10R	AACAGTATTCTTTGCTATAGTAGTCGG
15R	AAAGGTGTGAACATAACCATCCACTG
19R	TCTAAGCATAGTGAAAAGCATTGTCTG
23R	CTGATAGCAGCATTACCATCCTG
28R	GAGCCCTGTGATGAATCAACAGT
33R	CCTTAGAAACTACAGATAAATCTTGGGA
38R	ACTAGCGCATATACCTGCACC
42R	TGAGTACAGCTGGTAATAGTCTGAAG
47R	CGGCCAATGTTTGTAATCAGTTCC
Nested PCR and TAR fragment generation:
Primers used as published with exception for F3 and F9
B.1.1.7 F3 F	TGGCTTCACATATGTATTGTTCTTTT
B.1.1.7 F9 R	GCATCAGTAGTGTCATCAATGTC
